# Supplementary material
Source: publisher figshare collection journal article supplement (https://tandf.figshare.com/ndownloader/files/17915351)
Supplement: Supplementary file 1 [file 17915351]

Pyridinium Salts of Dithiophosphoric Acids on the Basis of Nicotinic acids and Their Isomers, 3-Hydroxypyridine and 3-Pyridinemethanol

Ilyas S. Nizamov1, 2*, Ramazan Z. Salikhov2, Ildus D. Timushev2, Yevgeniy N. Nikitin2, Ilnar D. Nizamov1, Vladimir Yu. Yakimov1, Marina P. Shulaeva3, Oscar K. Pozdeev3, Elvira S. Batyeva2, Rafael A. Cherkasov1, nd Anna S. Ponomareva4

*1A.M. Butlerov Chemical Institute, Kazan Federal University, Kazan, Russia
2A.E. Arbuzov Institute of Organic and Physical Chemistry, Federal Research Center, Kazan Scientific Center, Russian Academy of Sciences, Kazan, Russia*

*3Department of Microbiology, Kazan State Medical Academy, Kazan, Russia*

*4D.N. Pryanishnikov All-Russian Scientific Research Institute of Agrochemistry, Moscow, Russia*

Email : isnizamov@mail.ru

**Table S 1.** The Antimicrobial Activity of Compounds **6a** and **6b**a

| Compound | Zone of inhibition, mm | | | | |
| --- | --- | --- | --- | --- | --- |
|  | *E.*  *coli* | *B.*  *cereus* | *Ps.*  *aeruginosa* | *S.*  *aureus* | *Candida*  *albicans* |
| **6a** | 7 | 11 | 7 | 10 | 13 |
| **6b** | - | 11 | 12 | 7 | 21 |
| **Slayt (1%)**17 | 10 | 12 | 12 | 19 | 14 |

aIn 1% concentrations in DMSO.

**Table S 2**. FTIR Data of the Products Obtained

| Prod. | **max, cm-1 |
| --- | --- |
| **3a** | KBr: 3412 s vbr (H–O), 3080 vw, 3052 vw (=С-НAr), 2951 vs, 2878 m [as,s(СН3, СН2)], 2750 w (NH+), 1717 m (О=С–О), 1629 m, 1597 m, 1526 m (С=СAr), 1466 m [as(СН3)], 1399 m [s(СН3)], 1012 s [(P)O–C], 945 m (О–С, ОС–С), 661 m (P=S), 561 m (P–S). |
| **3b** | KBr:3444 s vbr (H–O), 2984 s, 2952 vs, 2879 s [as,s(СН3, СН2)], 2750 w (NH+), 1712 m (О=С–О), 1638 w, 1617 w, 1562 w (С=СAr), 1454 m [as(СН3)], 1388 m, 1368 m {s[(CH3)2C*gem.*]}, 1055 s, 1031 s, 1021 s [(P)O–C], 992 s, 978 s (О–С, ОС–С), 674 m (P=S), 537 m (P–S). |
| **3c** | KBr: 3444 m vbr (H–O), 2951 vs, 2978 s [as,s(СН3, СН2)], 2707 w (NH+), 1730 m (О=С–О), 1658 m, 1603 m, 1526 m (С=СAr), 1455 m [as(СН3)], 1387 m, 1368 m {s[(CH3)2C*gem.*]}, 1053 s, 1032 s [(P)O–C], 992 s, 978 s (О–С, ОС–С), 672 m (P=S), 561 m (P–S). |
| **6a** | Film:3331 s vbr (H–O), 3068 w (=С-НAr), 2961 vs, 2975 vs [as,s(СН3, СН2)], 2694 w (NH+), 1620 m, 1556 s (С=СAr), 1474 s [as(СН3)], 1398 m, 1367 m {s[(CH3)2C*gem.*]}, 1048 vs [(P)O–C], 995 vs (О–С, ОС–С), 694 s (P=S), 546 m (P–S). |
| **6b** | Film:3347 s vbr (H–O), 3057 w (=С-НAr), 2960 vs, 2974 vs [as,s(СН3, СН2)], 2714 w (NH+), 1630 m, 1610 m, 1550 s (С=СAr), 1470 s [as(СН3)], 1397 m, 1367 m {s[(CH3)2C*gem.*]}, 1048 vs [(P)O–C], 994 vs (О–С, ОС–С), 694 vs (P=S), 546 m (P–S). |

**Table S 3.** 1H NMR data for compounds prepared

| Comp. | ppm |
| --- | --- |
| **3a** | Acetone-*d*6: 0.83 s (6Н, С8Н3), 0.87 s [12Н, (С9,10Н3)2С], 1.25 m (4Н, С5Н2), 1.70 m (4Н, С6Н2), 2.20 m (4Н, С3Н2), 2.33 m (2Н, С4Н), 4.82 m (2Н, POC2H), 7.78 m (1H, C5’H), 8.56 d (1H, C4’H, 3*J*HH = 7.9 Hz), 8.96 d (1H, C6’H, 3*J*HH =4.1 Hz), 9.29 s (1H, C2’H) ppm. |
| **3b** | Acetone-*d*6: 0.84 s (6Н, С8Н3), 0.88 s [12Н, (С9,10Н3)2С], 1.25 m (4Н, С5Н2), 1.71 m (4Н, С6Н2), 2.20 m (4Н, С3Н2), 2.36 m (2Н, С4Н), 4.83 m (2Н, POC2H), 8.17 d (1H, C3’H, 1H, C5’H, 3*J*НН = 4.8 Hz), 9.30 m (1H, C4’H, 1H, C6’H) ppm. |
| **3c** | Acetone-*d*6: 0.84 s (6Н, С8Н3), 0.88 s [12Н, (С9,10Н3)2С], 1.20 m (4Н, С5Н2), 1.70 m (4Н, С6Н2), 2.20 m (4Н, С3Н2), 2.37 m (2Н, С4Н), 4.84 m (2Н, POC2H), 7.73 m (1H, C5’H), 8.12 m (1H, C4’H), 8.20 m (1H, C3’H), 8.75 m (1H, C6’H). |
| **6a** | СD3OD: 1.05 s [6Н, (С7,8Н3)2С], 3.93 d (2H, С4H2OP, 2H, С6H2OP, 3*J*PН = 15.9 Hz), 7.76 m (1H, C4’H), 7.78 m (1H, C5’H), 8.33 m (1H, C2’H), 8.34 m (1H, C6’H). |
| **6b** | Acetone-*d*6: 0.99 s [6Н, (С7,8Н3)2С], 3.93 d (2H, С4H2OP, 2H, С6H2OP, 3*J*PН = 15.5 Hz), 4.96 s (C7’H2O), 7.03 m (1H, OH), 8.05 d (1H, C5’H, 3*J*HН = 7.9 Hz), 8.06 d (1H, C5’H, 3*J*HН = 7.9 Hz), 8.54 d (1H, C4’H, 3*J*HН = 8.0 Hz), 8.95 d (1H, C6’H, 3*J*HН = 5.2 Hz), 9.01 s (1H, C2’H). |

**Table S 4.** 13С{1H} NMR data for compounds prepared

| Comp. | Acetone-*d*6, ppm |
| --- | --- |
| **3a** | 18.0 s (C8Н3), 23.2 s (C9Н3), 24.8 s (С10Н3), 31.0 s (С5Н2), 31.9 s (С6Н2), 33.0 s (С3Н2), 33.3 s (С3Н2), 43.9 s (С4Н), 50.1 s (С7), 50.4 s (С1), 88.4 d (РОС2H, 2*J*СР = 7.4 Hz), 129.8 s (C5’H), 132.1 s (C3’), 144.6 s (C4’H), 153.0 s (C6’H), 154.1 s (C2’H), 156.5 s (C7’=O). |
| **3b** | 12.8 s (C8Н3), 18.1 s (C9Н3), 19.6 s (С10Н3), 25.8 s (С5Н2), 28.1 s (С6Н2), 38.7 s (С3Н2), 45.2 s (С4Н), 47.5 s (С7), 49.1 s (С1), 84.0 d (РОС2H, 2*J*СР = 7.7 Hz), 124.2 s (C3’H, C5’H), 140.8 s (C4’), 148.2 s (C2’H, C6’H), 164.7 s (C7’=O). |
| **3c** | 12.8 s (C8Н3), 18.1 s (C9Н3), 19.6 s (С10Н3), 25.8 s (С5Н2), 28.1 s (С6Н2), 38.7 s (С3Н2), 45.2 s (С4Н), 47.5 s (С7), 49.1 s (С1), 84.4 d (РОС2H, 2*J*СР =7.9 Hz), 124.0 s (С3’H), 127.7 s (С5’H), 138.4 s (С4’H), 147.1 s (С2’), 148.7 s (С6’H), 164.4 s (C7’=O). |
| **6b** | 18.0 s (С7Н3), 21.4 s (С8Н3), 32.11 s (C5), 32.15 s (C5), 60.4 s (C7’H2O), 74.04 s (С4H2OP), 74.11 s (С6H2OP), 126.2 s (C5’H), 141.2 s (C4’H), 141.8 s (C3’), 142.0 s (C2’H), 142.3 s (C6’H). |

**Table S 5.** 31Р{1H} NMR data for compounds prepared

| Comp. | ppm |
| --- | --- |
| **3a** | Benzene: 111.0 |
| **3b** | Ethanol: 105.9 |
| **3c** | Ethanol: 109.8 |
| **6a** | Ethanol: 110.4 |
| **6b** | Ethanol: 111.2 |

**Table S 6.** Analytical data for compounds prepared

| Comp. |  |
| --- | --- |
| **3a** | Calculated (%) for C26H40NO4PS2: C, 59.40; H, 7.67; N, 2.66; P, 5.89; S, 12.20. Found (%): C, 59.15; H, 7.57; N, 2.34; P, 5.56; S, 12.56. |
| **3b** | Calculated (%) for C26H40NO4PS2: C, 59.40; H, 7.67; N, 2.66; P, 5.89; S, 12.20. Found (%): C, 59.15; H, 7.57; N, 2.34; P, 5.56; S, 12.56. |
| **3c** | Calculated (%) for C26H40NO4PS2: C, 59.40; H, 7.67; N, 2.66; P, 5.89; S, 12.20. Found (%): C, 59.73; H, 7.85; N, 2.43; P, 6.10; S, 12.45. |
| **6a** | Calculated (%) for C10H16NO3PS2: C, 40.94; H, 5.50; N, 4.77; P, 10.56; S, 21.86. Found (%): C, 41.23; H, 5.23; N, 4.44; P, 10.32; S, 22.13. |
| **6b** | Calculated (%) for C11H18NO3PS2: C, 42.98; H, 5.90; N, 4.56; P, 10.08; S, 20.86. Found (%): C, 43.23; H, 6.23; N, 4.34; P, 9.75; S, 21.16. |


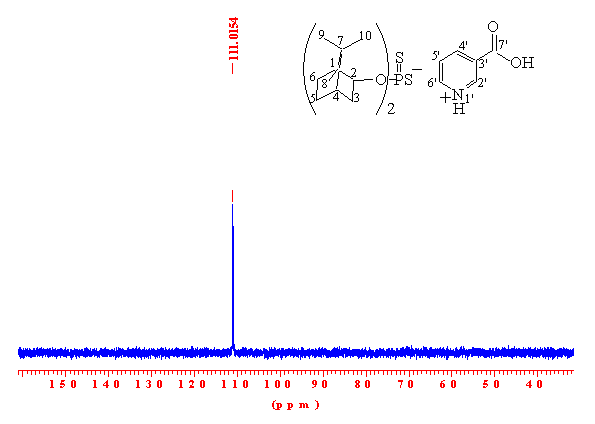


**Figure S 1.** 31Р{1H} NMR of salt **3a** in benzene.


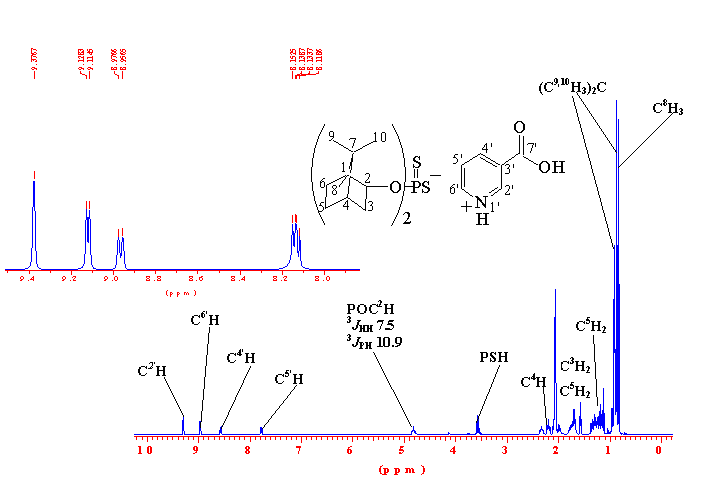


**Figure S 2.** 1H NMR of salt **3a** in acetone-*d*6.


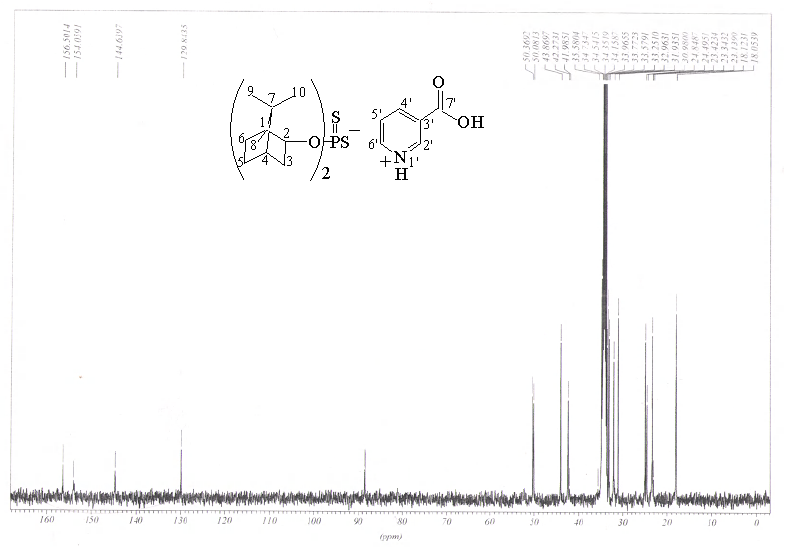


**Figure S 3.** 13С{1H} NMR of salt **3a** in acetone-*d*6.


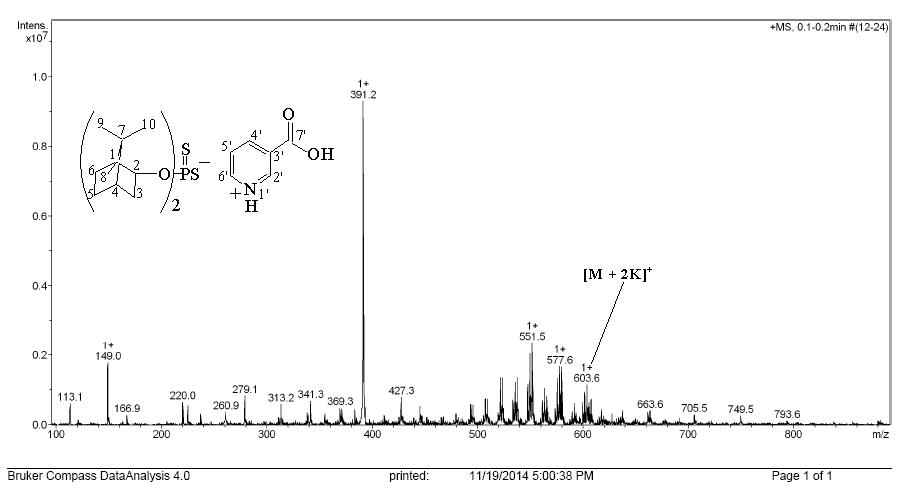


**Figure S 4.** The mass-spectrum of ESI of **3a** (acetone) (calculated *M* 525.7).


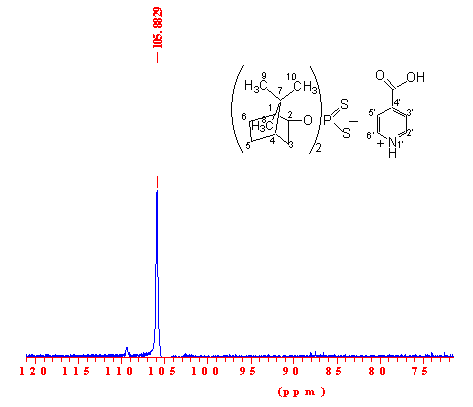


**Figure S 5.** 31Р{1H} NMR of salt **3b** in ethanol.


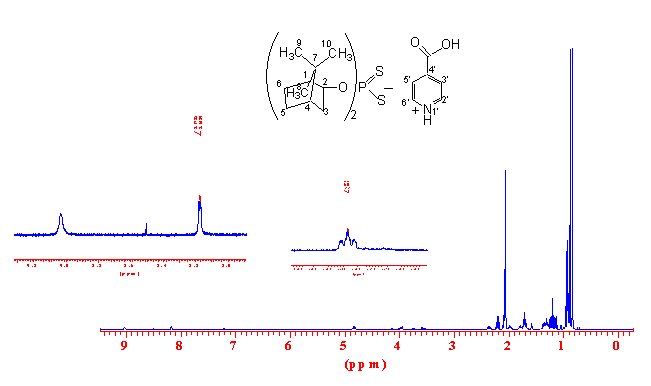


**Figure S 6.** 1H NMR of salt **3b** in acetone-*d*6.


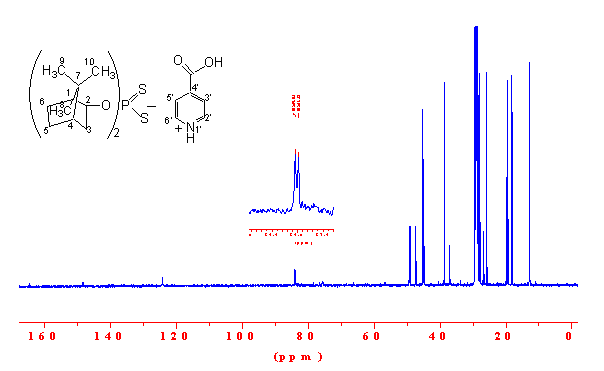


**Figure S 7.** 13С{1H} NMR of salt **3b** in acetone-*d*6.


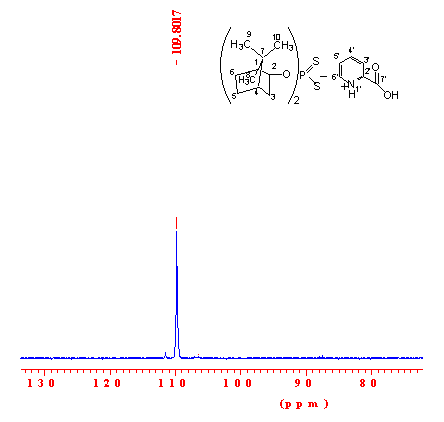


**Figure S 8.** 31Р{1H} NMR of salt **3с** in ethanol.


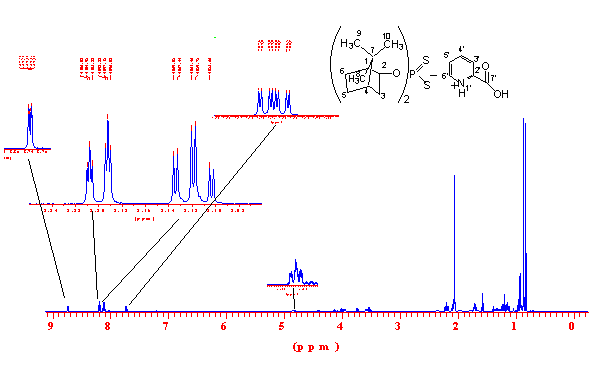


**Figure S 9.** 1H NMR of salt **3c** in acetone-*d*6.


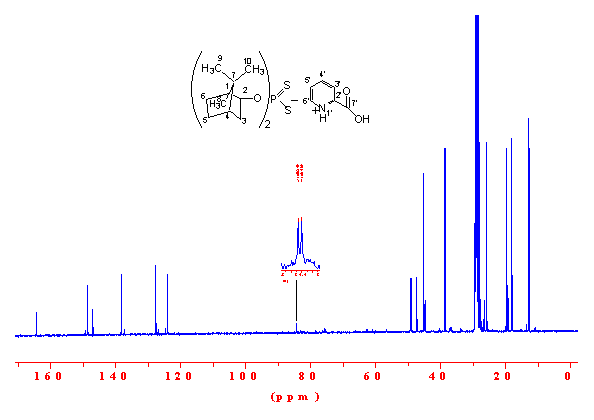


**Figure S 10.** 13С{1H} NMR of salt **3c** in acetone-*d*6.


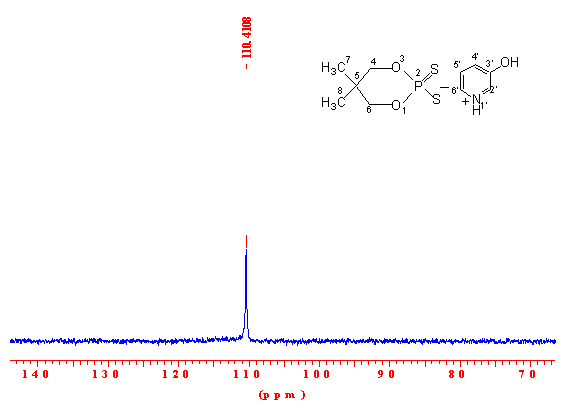


**Figure S 11.** 31Р{1H} NMR of salt **6a** in ethanol.


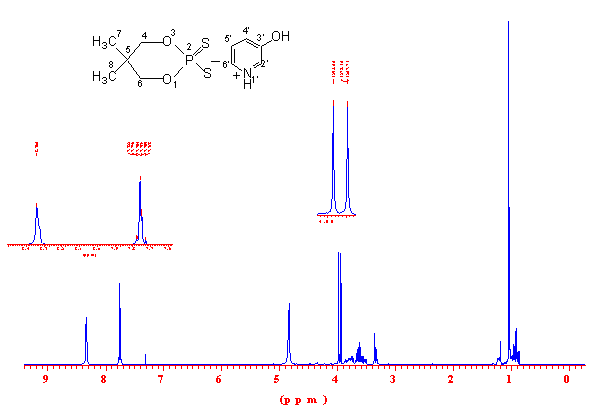


**Figure S 12.** 1H NMR of salt **6a** in СD3OD.


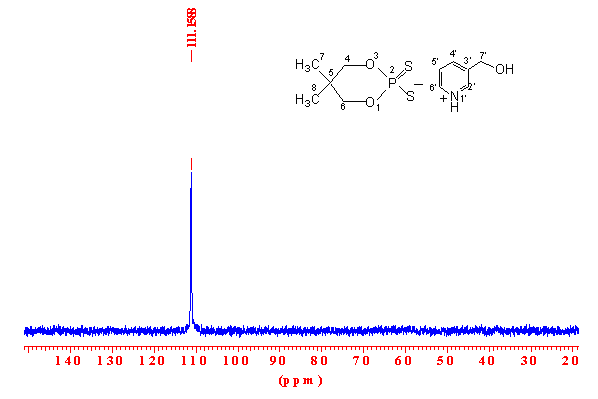


**Figure S 13.** 31Р{1H} NMR of salt **6b** in ethanol.


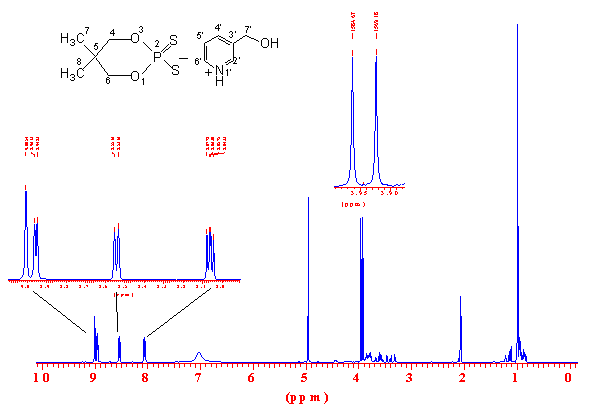


**Figure S 14.** 1H NMR of salt **6b** in acetone-*d*6.


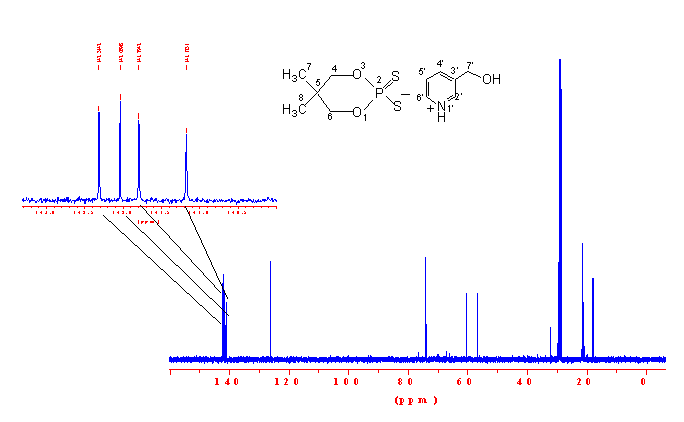


**Figure S 15.** 13С{1H} NMR of salt **6b** in acetone-*d*6.


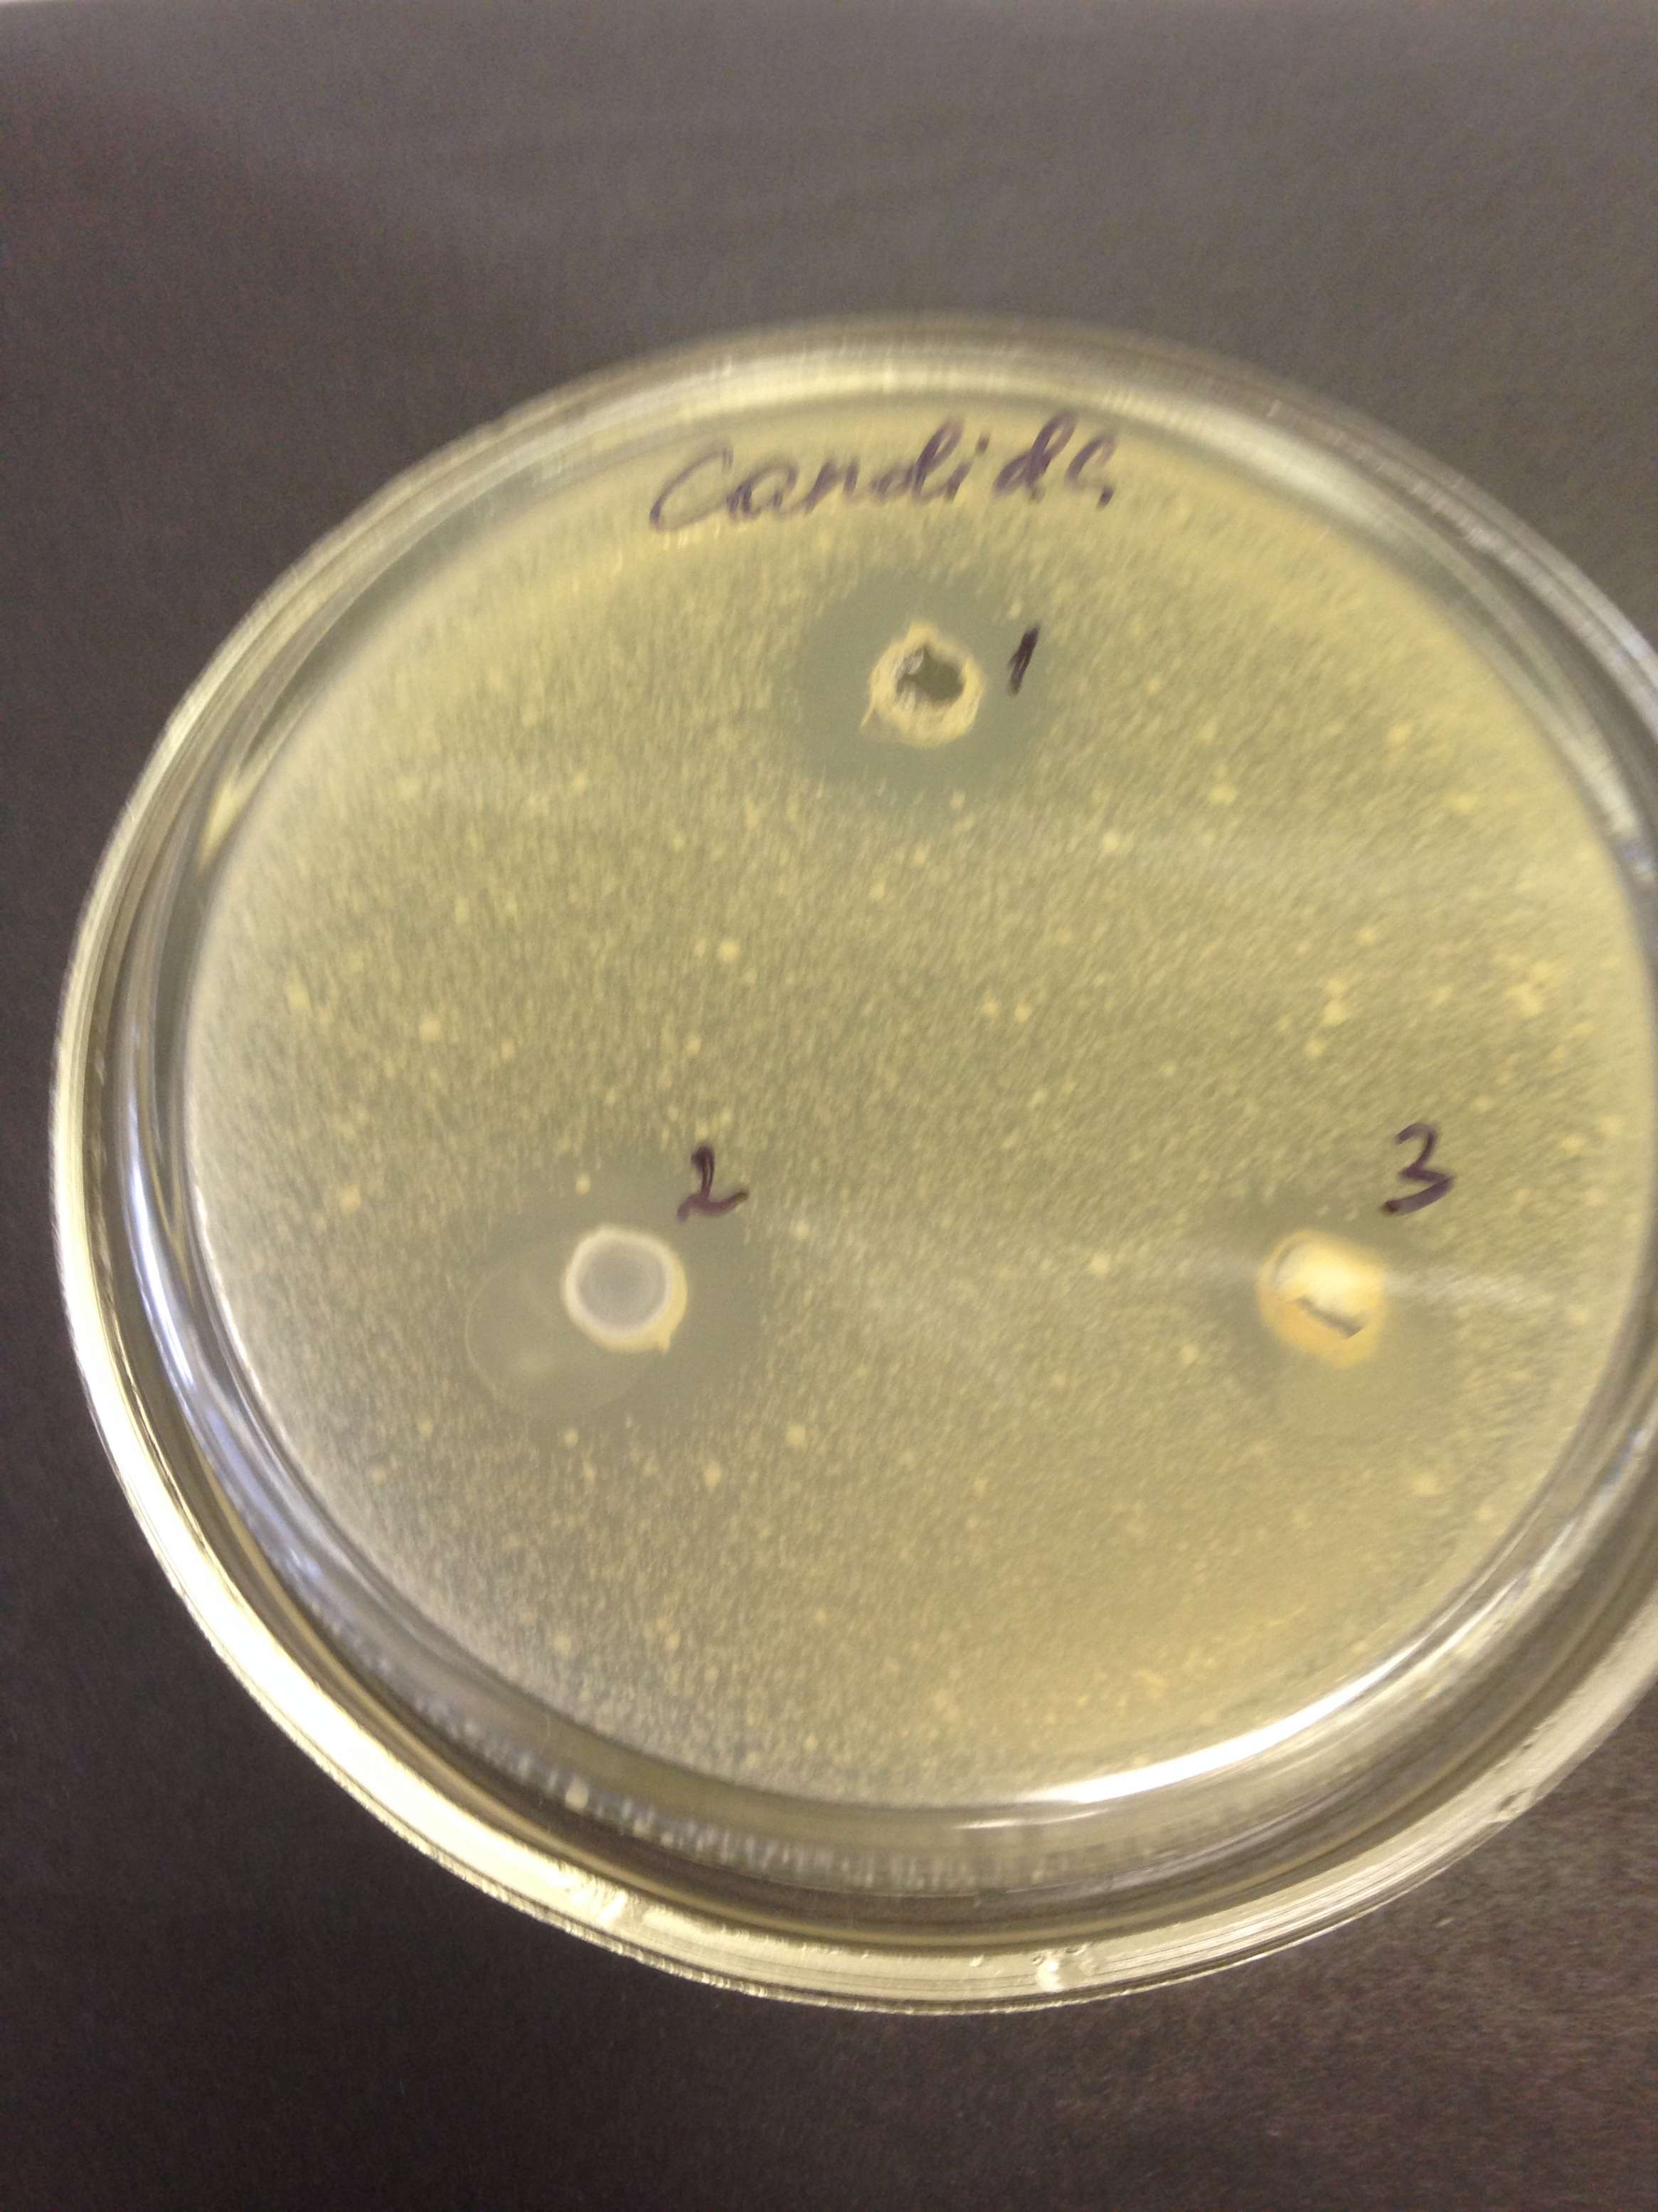


**Figure S 16.** Antifungal activity of compound **6b** against *Candida albicans* (indicated as 2)


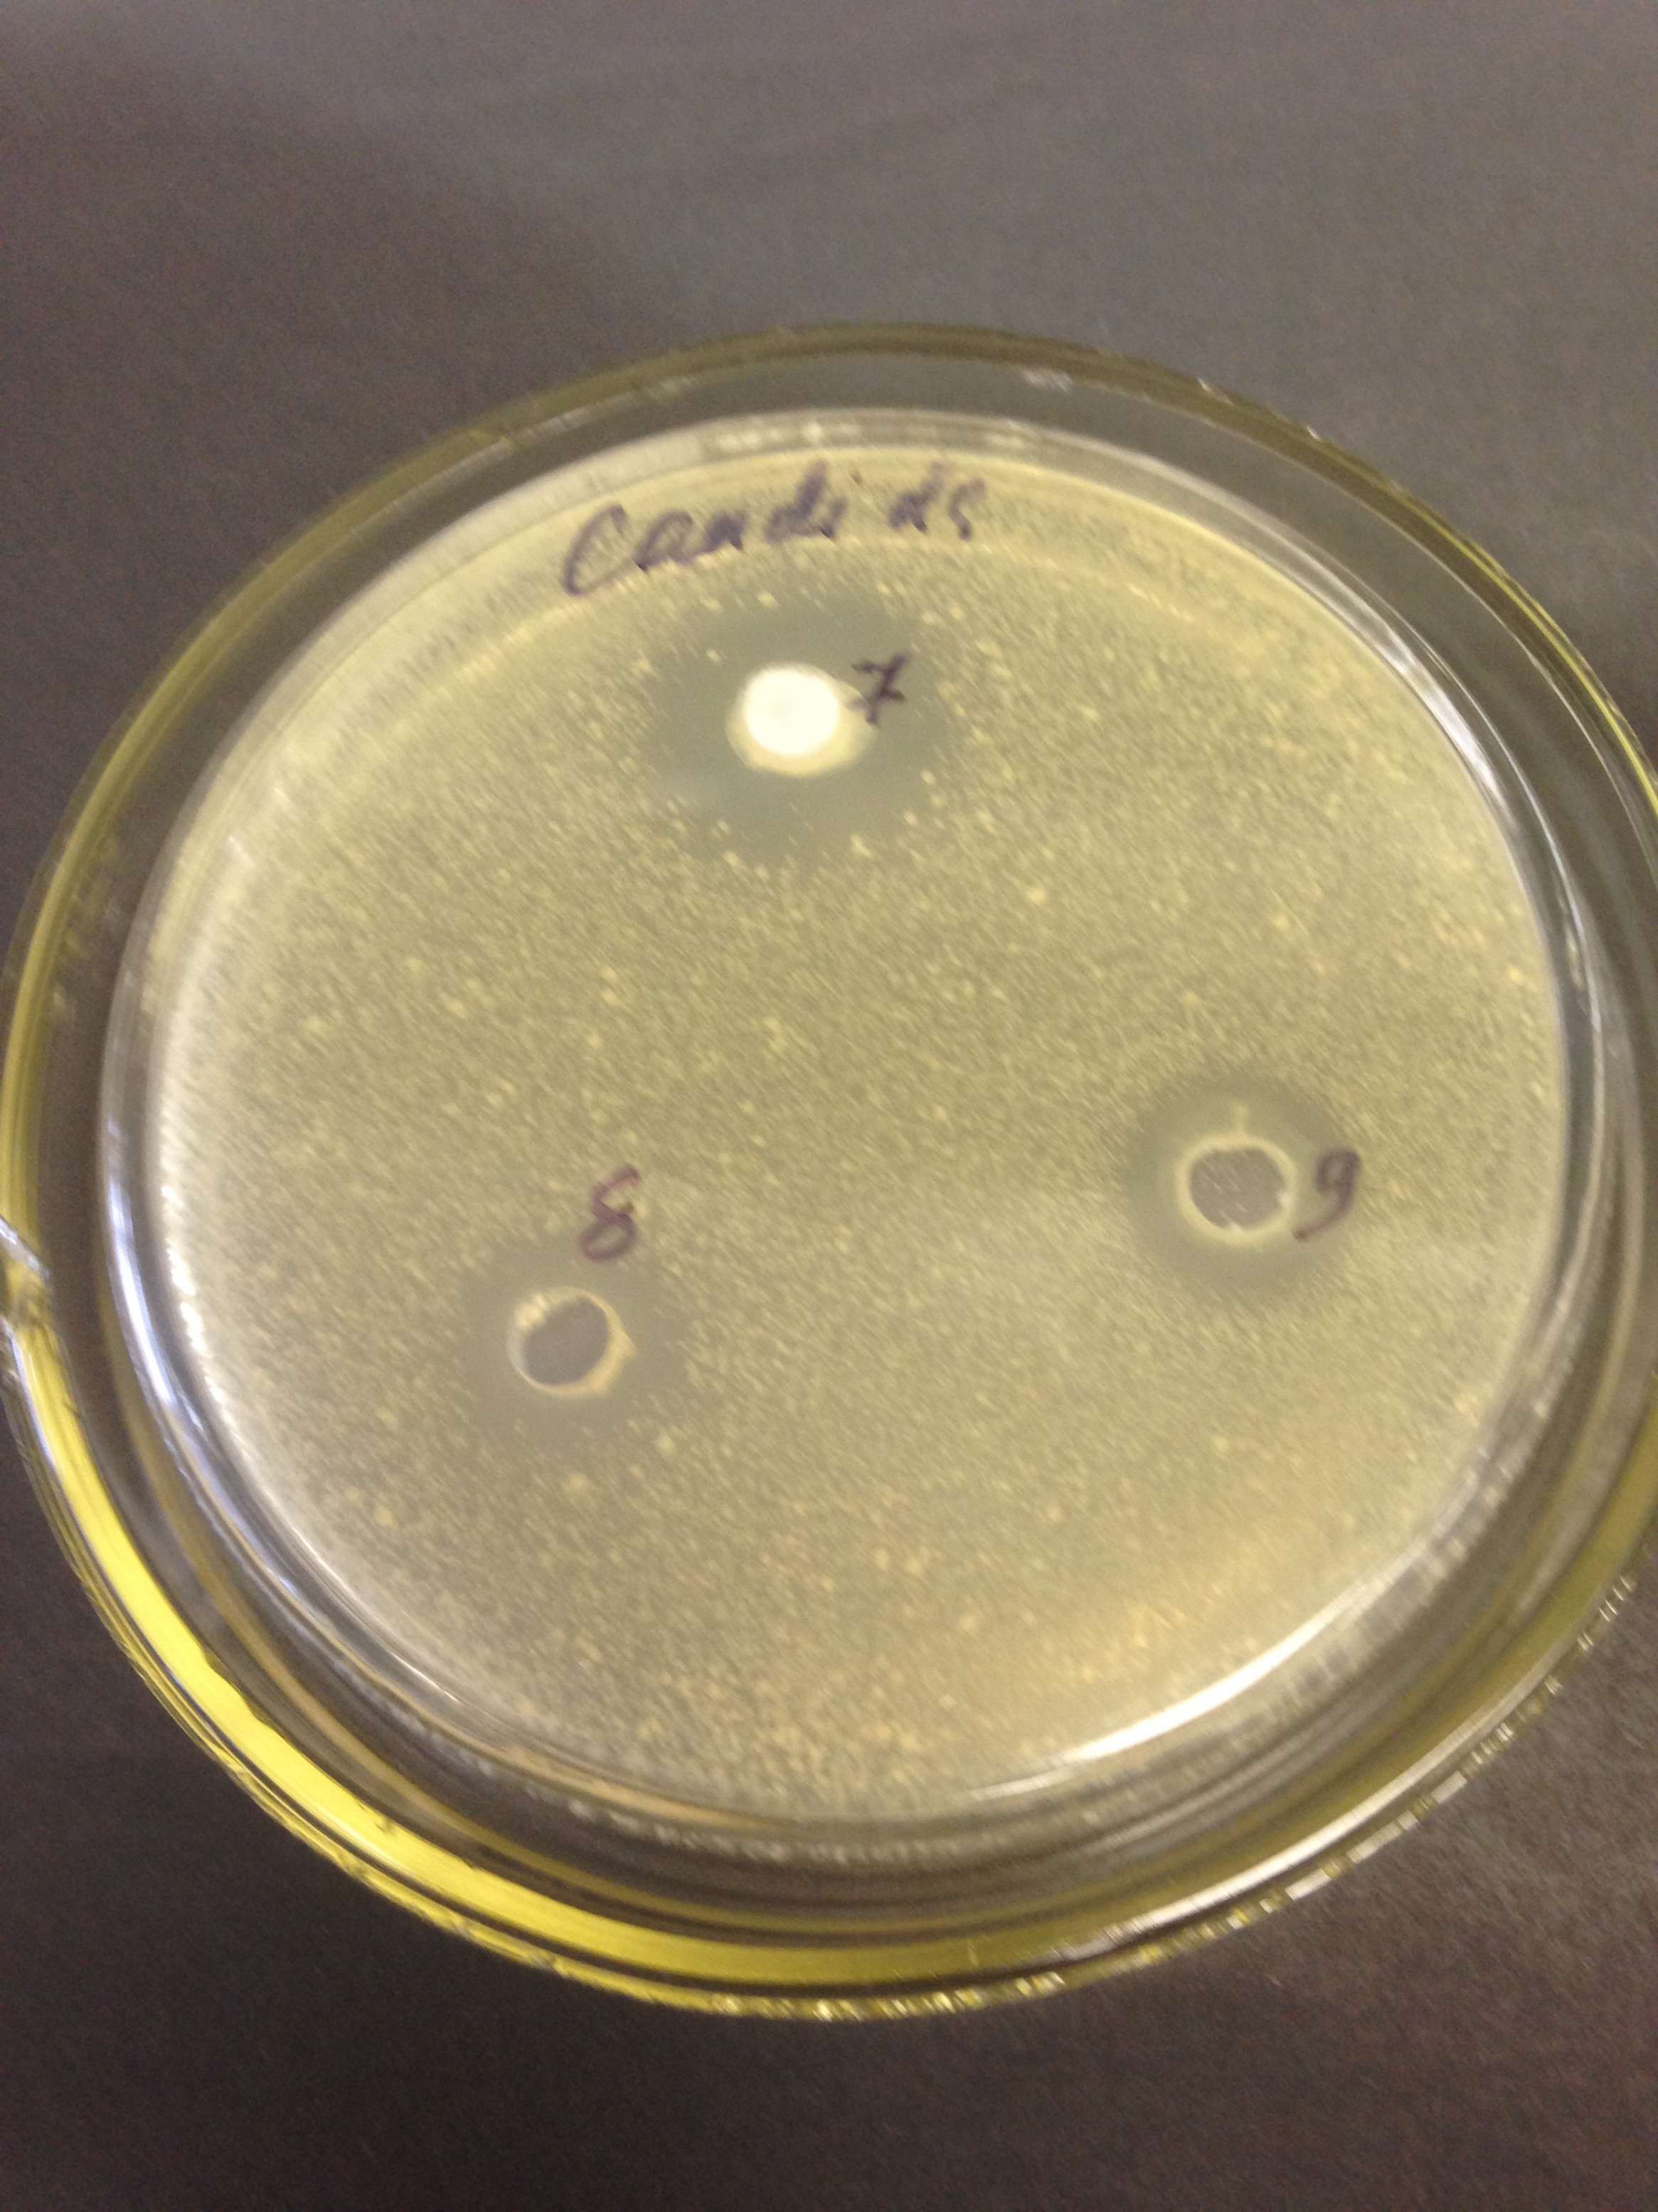


**Figure S 17.** Antifungal activity of compound **6a** against *Candida albicans* (indicated as 7)
